# Supplementary material for: A Multivalent Vaccine Based on Ferritin Nanocage Elicits Potent Protective Immune Responses against SARS-CoV-2 Mutations
Source: MDPI journal article supplement (doi:10.3390/ijms23116123), 2022-05-30
Supplement: s1 [file s1]

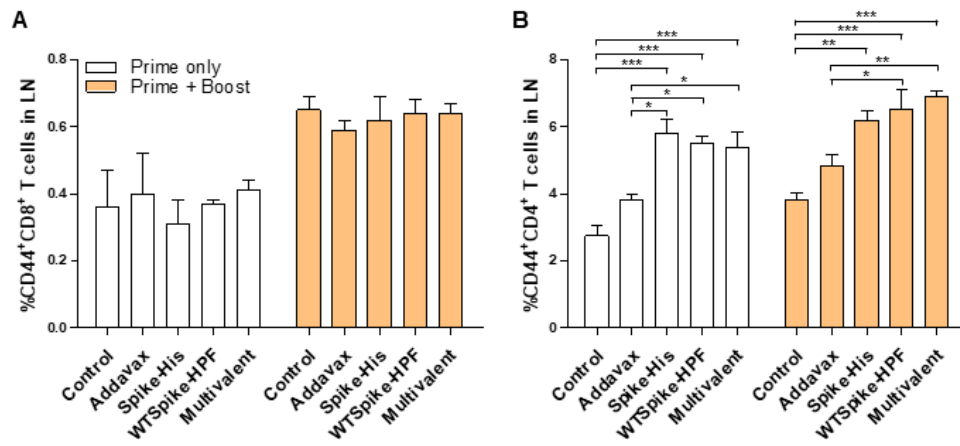

**Figure S1.** The memory T cells in lymph nodes upon HPF-Spike vaccination. **(A,B)** CD44 expressing CD8<sup>+</sup> **(A)** and CD4<sup>+</sup> **(B)** T cells were analyzed using flow cytometry. Statistical comparisons were performed using student t-test and statistically significant differences were presented as follows:  $p < 0.05$  \*,  $p < 0.01$  \*\*, or  $p < 0.001$  \*\*\*.
